# Supplementary material for: CRISPRtracrRNA: robust approach for CRISPR tracrRNA detection
Source: PubMed Central journal article supplement — Bioinformatics. 2022 Sep 18;38(Suppl 2):ii42–8. doi: 10.1093/bioinformatics/btac466 (PMC9486595; doi:10.1093/bioinformatics/btac466), 2022-09-18
Supplement: btac466_supplementary_data.pdf [file btac466_supplementary_data.pdf]

# CRISPRtracr supplementary materials

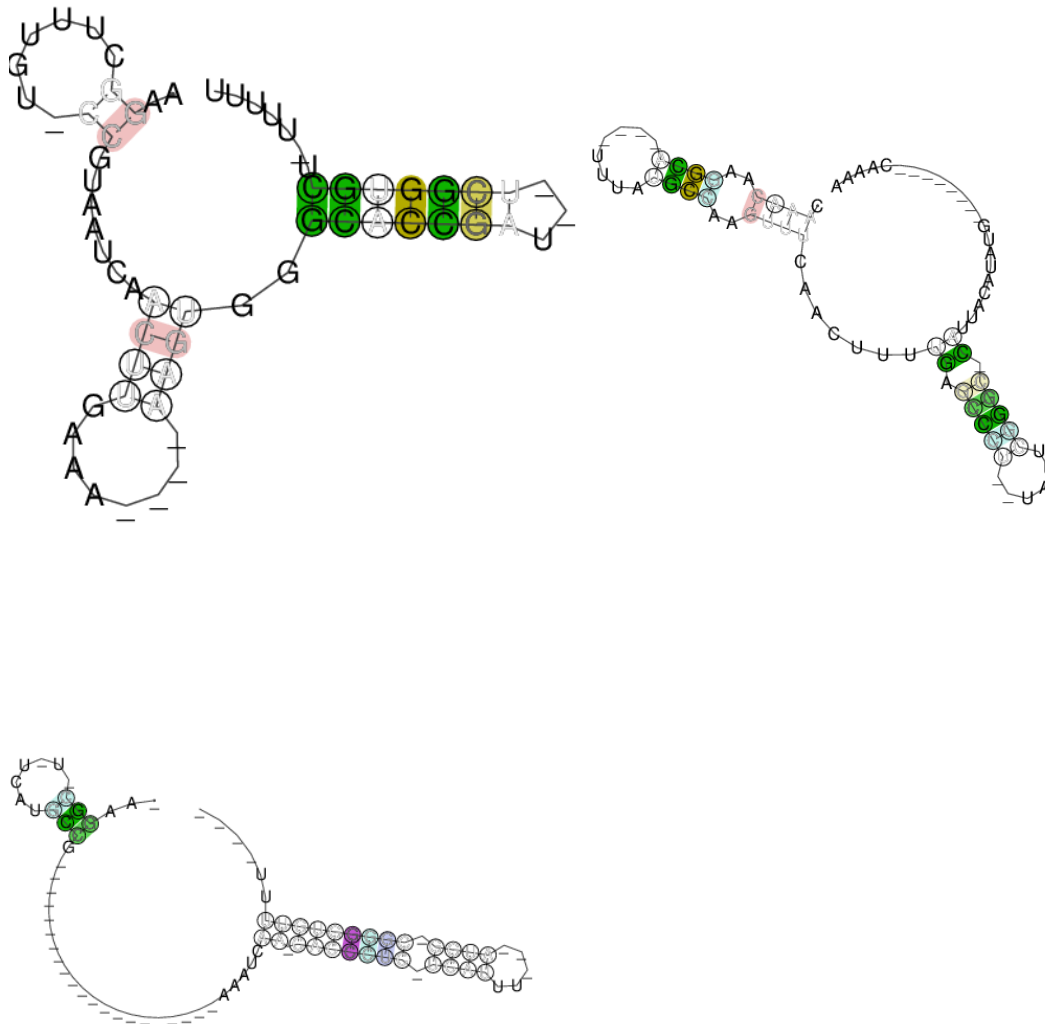

**Figure S1.** Consensus structure of the tail sequences for 3 clusters. The representation is taken directly from the GraphClust2 pipeline.



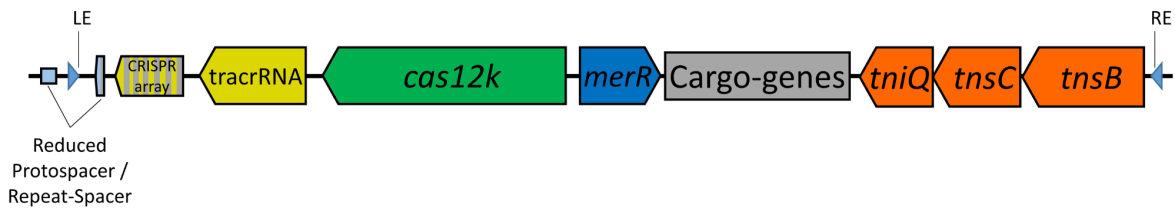

**Figure S3.** Gene map of common CAST system

The CAST transposon is displayed from its left insertion element (LE) to its right insertion element (RE). The genes are colored according to their function (green: *cas12k*, orange: Transposase, blue: *merR*-regulator, yellow: RNA transcribing regions). The CRISPR array is depicted with its Repeats (grey) and Spacers (yellow) separated from the reduced repeat-spacer pair (~12 nt repeat, ~17 nt spacer), corresponding to a protospacer upstream of the LE-element (light blue).

Query: 1 [L=189]  
Hit scores:

| rank                            | E-value | score | bias | modelname                                    | start | end | mdl | trunc | gc      | description |
|---------------------------------|---------|-------|------|----------------------------------------------|-------|-----|-----|-------|---------|-------------|
| (1) !                           | 3.7e-41 | 131.2 | 0.0  | dataset_ac9e1c46-3bdb-438c-b4e4-d87c82a0bf98 | 88    | 189 | +   | cm    | no 0.60 | -           |
| (2) !                           | 3.6e-36 | 111.9 | 0.0  | dataset_8c0eca81-d482-4680-8a18-52bf60a8c927 | 90    | 189 | +   | cm    | no 0.59 | -           |
| (3) !                           | 1.6e-18 | 65.9  | 0.0  | dataset_bb909aed-2e23-46c9-b48a-cfc70a24cc0b | 106   | 189 | +   | cm    | no 0.58 | -           |
| (4) !                           | 2.9e-18 | 58.0  | 0.0  | dataset_ea4e8ca6-a768-42a6-9697-12da98e5493e | 92    | 189 | +   | cm    | no 0.59 | -           |
| (5) !                           | 3.2e-18 | 57.6  | 0.0  | dataset_8f025680-be32-4e39-800f-241dd6189933 | 90    | 189 | +   | cm    | no 0.59 | -           |
| (6) !                           | 8.8e-18 | 55.5  | 0.0  | dataset_d82cbec9-f11a-44f7-90f8-eb3ad81f52af | 1     | 102 | +   | cm    | no 0.50 | -           |
| (7) !                           | 1.7e-17 | 59.2  | 0.0  | dataset_c223a4d9-f85f-481c-99c9-d740a2614d96 | 1     | 102 | +   | cm    | no 0.50 | -           |
| (8) !                           | 3.9e-14 | 44.7  | 0.0  | dataset_d5f82872-fcbb-48d9-bd73-534e21290062 | 1     | 83  | +   | cm    | no 0.47 | -           |
| (9) !                           | 3.3e-13 | 44.1  | 0.0  | dataset_2b49d5c0-6516-4a11-9d43-bdd362a64f01 | 52    | 129 | +   | cm    | no 0.60 | -           |
| (10) !                          | 5.4e-11 | 34.8  | 0.0  | dataset_d88cd498-b5c3-46f6-bc9d-cd1b2694ca46 | 52    | 127 | +   | cm    | no 0.59 | -           |
| (11) !                          | 8e-10   | 34.4  | 0.0  | dataset_0d97656a-f089-4cea-b254-1037e8105f1a | 1     | 102 | +   | cm    | no 0.50 | -           |
| (12) !                          | 2.6e-09 | 33.9  | 0.0  | dataset_337bf8ea-be72-4180-b7cd-c98b90660b72 | 52    | 129 | +   | cm    | no 0.60 | -           |
| (13) !                          | 4.3e-09 | 28.9  | 0.0  | dataset_56eb54d6-41b5-4287-951f-8c211a177cfe | 52    | 84  | +   | cm    | no 0.52 | -           |
| (14) !                          | 0.0001  | 17.9  | 0.0  | dataset_5e0a073e-da8c-46f7-8ac4-f8b97f52eed1 | 102   | 127 | +   | cm    | no 0.65 | -           |
| (15) !                          | 0.0098  | 11.7  | 0.0  | dataset_80e8b885-fe88-4767-a3d9-7e67ae2f2891 | 61    | 128 | +   | cm    | no 0.59 | -           |
| ----- inclusion threshold ----- |         |       |      |                                              |       |     |     |       |         |             |
| (16) ?                          | 3.3     | 1.0   | 0.0  | dataset_0d97656a-f089-4cea-b254-1037e8105f1a | 143   | 146 | +   | cm    | 3' 0.50 | -           |
| (17) ?                          | 3.4     | 0.9   | 0.0  | dataset_d5f82872-fcbb-48d9-bd73-534e21290062 | 90    | 102 | +   | cm    | no 0.69 | -           |

**Figure S4.** Infernal cmscan hits of the type V validation dataset tracrRNA candidates with the pretrained model.

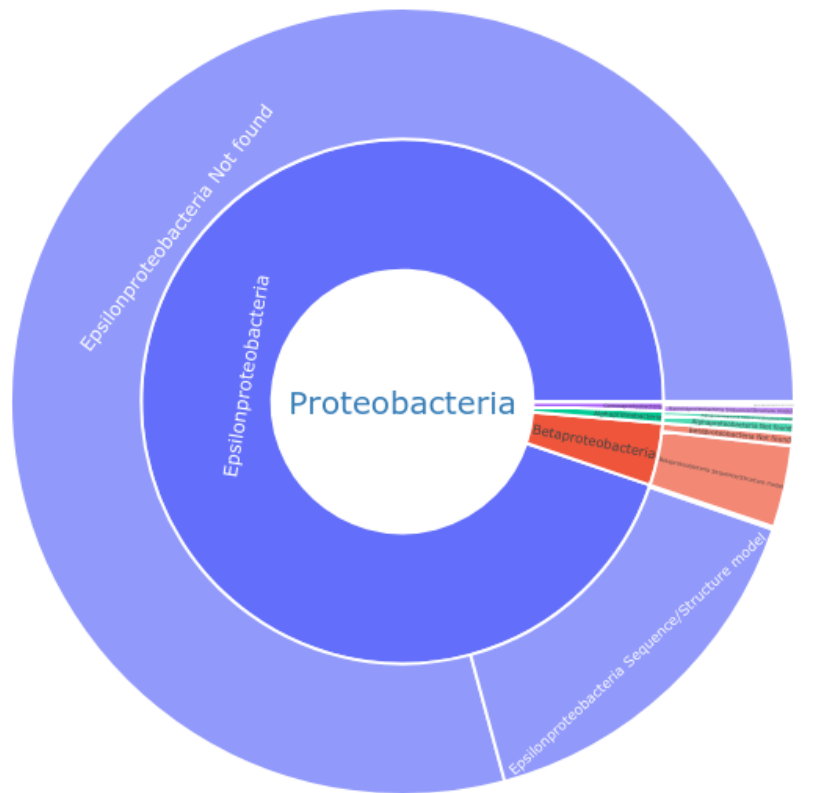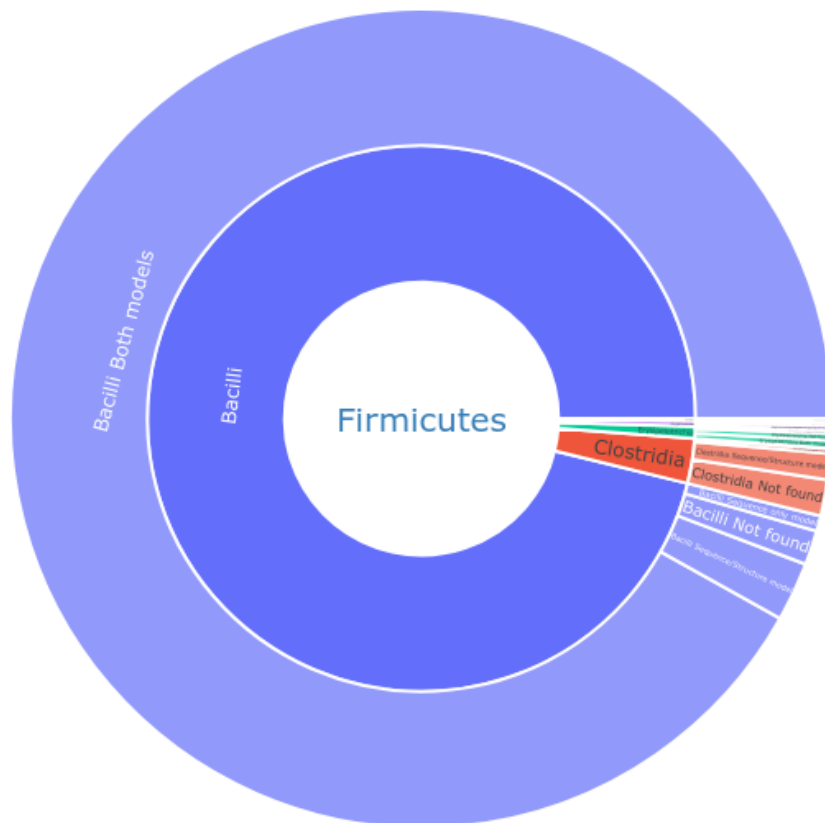

**Figure S5.** Distribution of the found candidates of sequence only and sequence/structure models in the Proteobacteria and Firmicutes phylums.

| Evidence factor              | Default importance weigh for candidate ranking (not a threshold value) |
|------------------------------|------------------------------------------------------------------------|
| CRISPR array certainty score | 0.5                                                                    |
| Anti-repeat BLAST similarity | 0.5                                                                    |
| Anti-repeat BLAST coverage   | 0.5                                                                    |
| BLAST similarity * coverage  | 0.5                                                                    |
| IntaRNA score                | 0.6                                                                    |
| CM Model hit score           | 0.9                                                                    |
| Terminator score             | 0.9                                                                    |
| Consistency orientation      | 0.1                                                                    |
| Consistency anti-repeat/tail | 0.1                                                                    |
| Consistency tail/terminator  | 0.1                                                                    |

**Table S1** The default values for evidence component importance. The user might assign the values between 0 and 1 to adjust the output according to their priority.

More data is available on  
<https://github.com/BackofenLab/CRISPRtracrRNA>
